# Supplementary material
Source: HighWire-hosted journal article supplement (http://ajnr-stage2.highwire.org/highwire/filestream/109476/field_highwire_adjunct_files/0/0835.pdf)
Supplement: 0835.pdf [file 0835.pdf]

## Supplementary Material

**Supplementary Table 1** Local control athletes vs. additional control athletes

| Variable                                        | Local iTAKL-Control Athletes (n = 13) | Additional Control Athletes (n = 21) | p-value <sup>1</sup> |
|-------------------------------------------------|---------------------------------------|--------------------------------------|----------------------|
| Age                                             | 17.22 (15.82, 17.38)                  | 16.00 (15.00, 17.00)                 | 0.14                 |
| Preseason Verbal Memory composite               | 87 (85, 96)                           | 85 (79, 96)                          | 0.53                 |
| Preseason Visual Memory composite               | 81 (68, 88)                           | 80 (73, 88)                          | 0.89                 |
| Preseason Visual Motor composite                | 41 (35, 45)                           | 42 (34, 45)                          | 0.83                 |
| Preseason Reaction Time composite               | 0.58 (0.56, 0.63)                     | 0.56 (0.52, 0.59)                    | 0.27                 |
| Preseason Impulse Control composite             | 5 (3, 7)                              | 5 (3, 8)                             | 0.68                 |
| Preseason Total Symptom Score                   | 3 (1, 4)                              | 1 (0, 4)                             | 0.43                 |
| Postseason Verbal Memory composite              | 93 (86, 99)                           | 93 (83, 99)                          | 0.54                 |
| Postseason Visual Memory composite              | 84 (78, 91)                           | 89 (75, 94)                          | 0.66                 |
| Postseason Visual Motor composite               | 41.2 (37.5, 45.9)                     | 43.3 (39.1, 47.6)                    | 0.78                 |
| Postseason Reaction Time composite              | 0.54 (0.53, 0.60)                     | 0.56 (0.53, 0.58)                    | 0.68                 |
| Postseason Impulse Control composite            | 5 (4, 7)                              | 6 (4, 9)                             | 0.34                 |
| Postseason Total Symptom Score                  | 4 (2, 7)                              | 2 (0, 4)                             | 0.11                 |
| Values: Median (IQR); 1 Wilcoxon rank sum test. |                                       |                                      |                      |

**Supplementary Figure 1** Features of salience network connectivity change in the football players (n = 57) and the control athletes (n = 13)

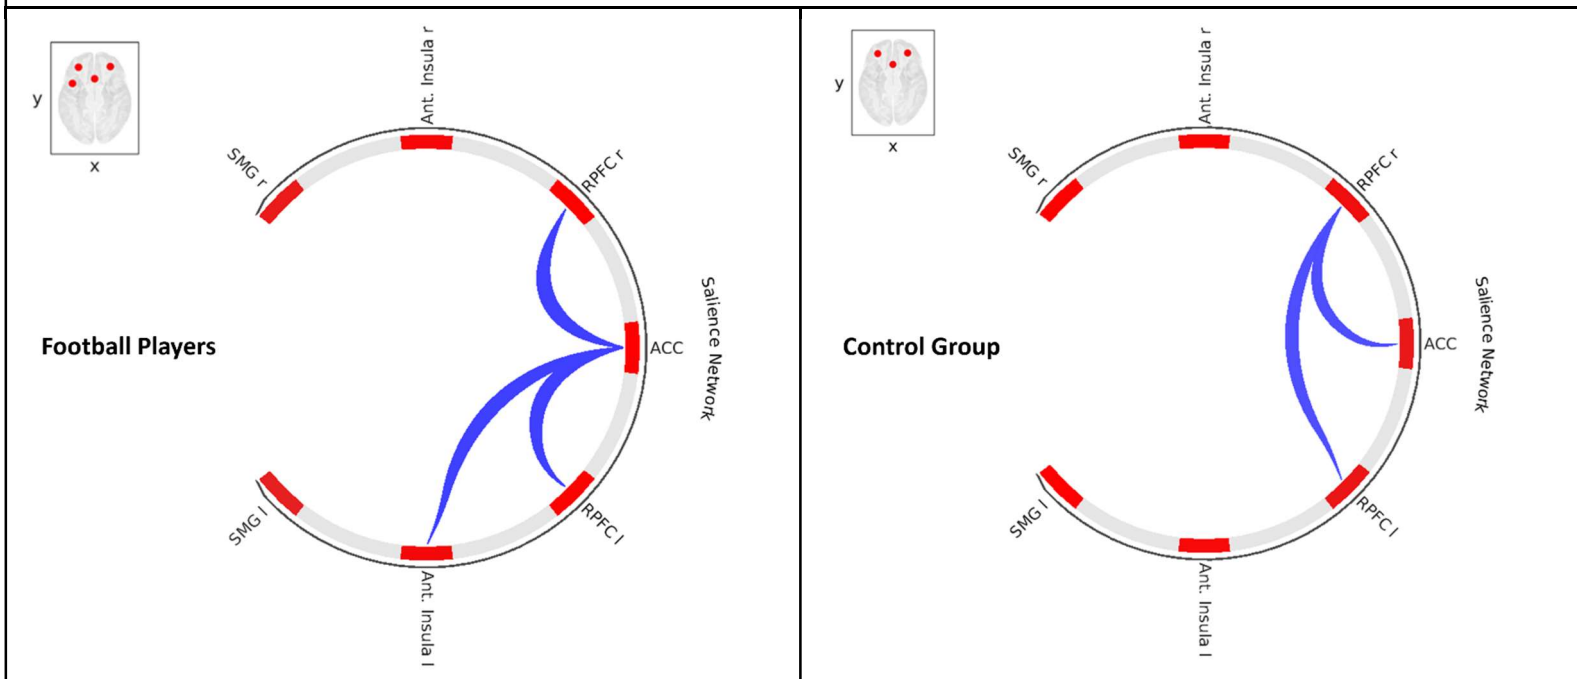

Blue lines represent significant decrease in connectivity between the regions post-season (uncorrected connection level  $p < 0.05$ ).

Abbreviations: ACC = Anterior Cingulate Cortex; RPFC = Rostral Prefrontal Cortex; SMG = Supramarginal Gyrus; Ant. = Anterior.
